# Supplementary material for: Physically Crosslinked Chondroitin Sulfate (CS)–Metal Ion (M: Fe(III), Gd(III), Zn(II), and Cu(II)) Particles for Versatile Applications and Their Biosafety
Source: MDPI journal article supplement (doi:10.3390/ph16040483), 2023-03-23
Supplement: s1 [file s1]

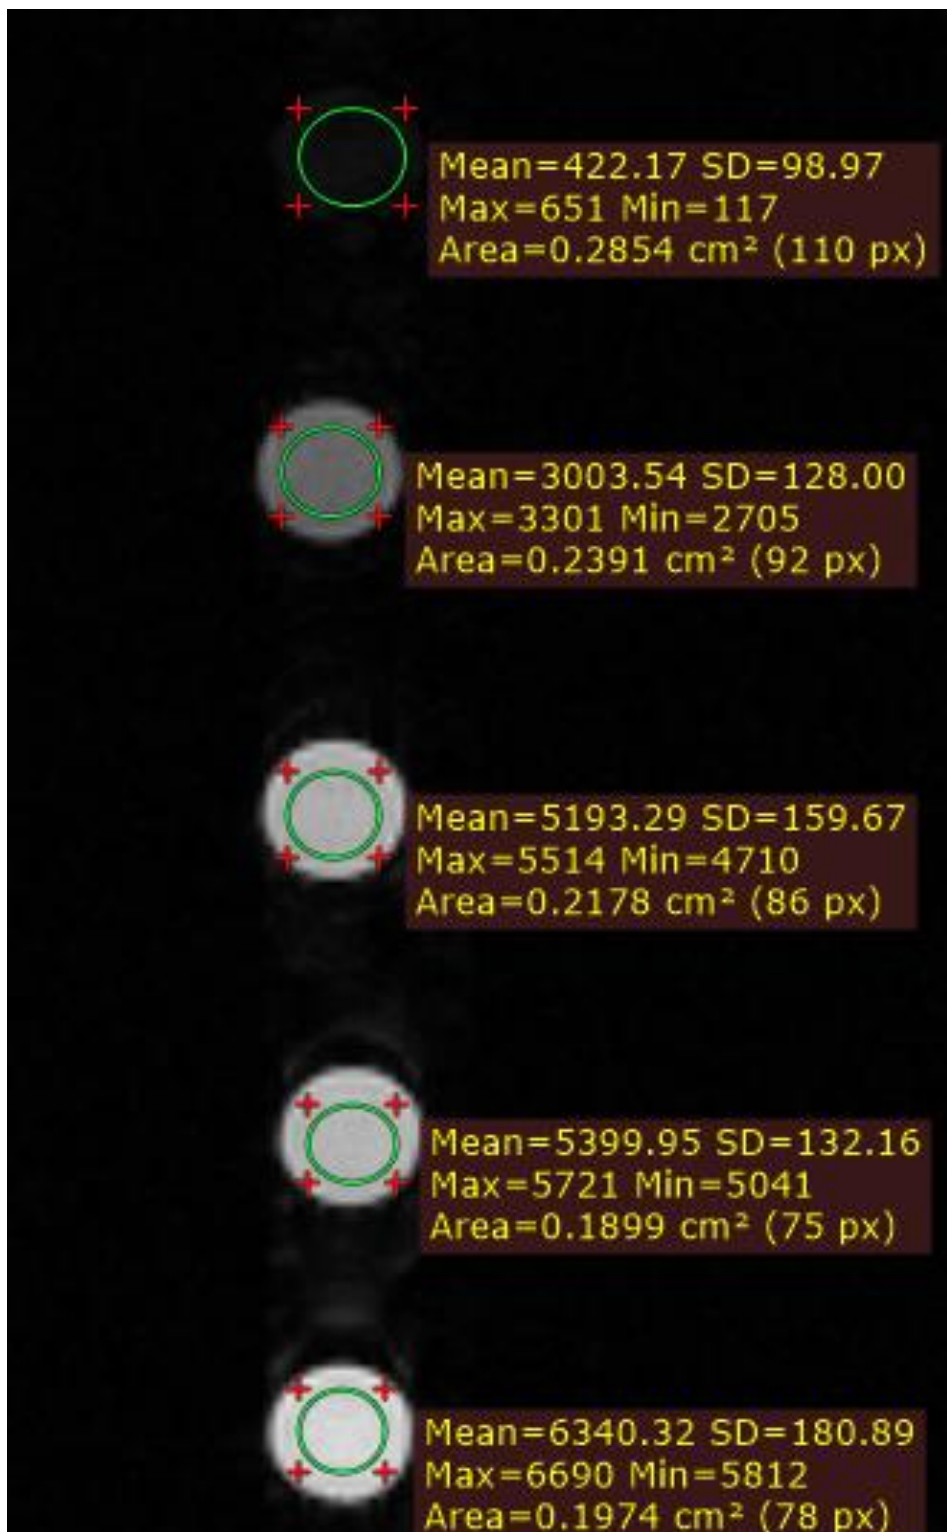

**Figure S1.** An example of selected ROIs in order to read the signal intensities on MRI image in RadiAnt DICOM Viewer (Image obtained with SE sequence TR=5000 ms TE=30 ms).
